# Supplementary material for: Single-molecule charge transfer dynamics in dye-sensitized p-type NiO solar cells: influences of insulating Al2O3layers
Source: Royal Society of Chemistry journal article supplement (doi:10.1039/c1sc00552a), 2011-10-11
Supplement: c1sc00552a.pdf [file c1sc00552a.pdf]

## Electronic Supplementary Information (ESI)

# Single-molecule charge transfer dynamics in dye-sensitized p-type NiO solar cells: influences of insulating Al<sub>2</sub>O<sub>3</sub> layers

Zhenfeng Bian, Takashi Tachikawa\*, Shi-Cong Cui, Mamoru Fujitsuka,  
and Tetsuro Majima\*

The Institute of Scientific and Industrial Research (SANKEN), Osaka University,  
Mihogaoka 8-1, Ibaraki, Osaka 567-0047, Japan

\*e-mail: tachi45@sanken.osaka-u.ac.jp (T.T.); majima@sanken.osaka-u.ac.jp (T.M.)

### Experimental Methods

**Preparation of NiO Nanoparticle Films for Steady-State and Time-Resolved Spectral Measurements.** The synthesis of Ni(OH)<sub>2</sub> is the same as above, the difference is only dispersed the Ni(OH)<sub>2</sub> in 15 ml milli-Q water after centrifuged to obtain the Ni(OH)<sub>2</sub> sol. The NiO film was prepared by dip coating Ni(OH)<sub>2</sub> sol onto cleaned glass wafer, and was annealed at 500 °C for 1 h. The thickness of NiO layer is about 0.5-1 μm.

**Preparation of NiO Nanoparticle Films for Photoelectrochemical Measurements.** The synthesis of Ni(OH)<sub>2</sub> is the same as above, the difference is only dispersed the Ni(OH)<sub>2</sub> in 5 ml milli-Q water after centrifuged to obtain the Ni(OH)<sub>2</sub> sol. The NiO nanoparticles was obtained from the Ni(OH)<sub>2</sub> sol was annealed at 500 °C for 1 h. The NiO electrode film was prepared by spreading the NiO nanoparticle paste (NiO nanoparticles: Ni(OH)<sub>2</sub> sol (molar ratio)= 4:1) onto conducting glass substrates followed by sintering at 450 °C for 30 min. The thickness of NiO layer is about 15-25 μm.

**Preparation of Al<sub>2</sub>O<sub>3</sub>/NiO Film for Steady-State and Time-Resolved Spectral Measurements.** NiO films were dipped into a solution of 0.15 M aluminum tri-sec-butoxide (99.9%, from Aldrich) in isopropanol at 50-60 °C for 15 min. The

films were washed with isopropanol three times, hydrolyzed in water, and then annealed at 450 °C in air for 60 min.

**Preparation of Al<sub>2</sub>O<sub>3</sub>/NiO Film for Photoelectrochemical Measurements.** The NiO electrode film was dipped into a solution of 0.0015 M aluminum tri-*sec*-butoxide (99.9%, from Aldrich) in isopropanol at 50-60 °C for 15 min. The film was annealed at 450 °C in the air for 60 min.

**Sample Preparation for Steady-State and Time-Resolved Spectral Measurements.** The NiO films were soaked in an aqueous solution of WS-PDI (0.2 mM) for 24 h at room temperature.

**Sample Preparation for Photoelectrochemical Measurements.** The NiO electrode films were soaked in an aqueous solution of WS-PDI (0.2 mM) for 24 h at room temperature. After dried, the NiO electrode film was assembled face-to-face with a platinized counter electrode using a 1 mm thick silicone rubber spacer to form a chamber. The photoirradiated active area was 0.36 cm<sup>2</sup>. An Ar-saturated acetonitrile electrolyte solution containing NaI (0.5 M) and I<sub>2</sub> (0.05 M) was then introduced into the chamber. IPCE spectrum was measured using Xenon light source (LAX-C100) through four bandpass filters (BP470-495 (Olympus, centered at 480 nm); BP520-550 (Olympus, centered at 535 nm); D585/20m (Chroma Technology, centered at 585 nm); D630/30m (Chroma Technology, centered at 630 nm)).

**Atomic Force Microscope (AFM) Measurements.** AFM measurements were performed using a Seiko Instruments SPA400 (DFM mode) at room temperature.

**Powder X-Ray Diffraction (XRD).** Crystallographic information of NiO nanoparticle films was analyzed using X-ray diffractometer (XRD) (Rigaku, RINT2500 XRD; Cu K $\alpha$  source).

**Electrochemical Measurements.** Differential pulse voltammetry (DPV) experiments were carried out at room temperature using an electrochemical analyzer (ALS, model 660A) with a standard three-electrode configuration, which was composed of a Au gauze working electrode, a Pt wire counter electrode, and a Ag/Ag<sup>+</sup> aqueous reference electrode. All potentials were calibrated using methyl viologen (1.0 mM)

as an internal standard and are reported with respect to the normal hydrogen electrode (NHE).

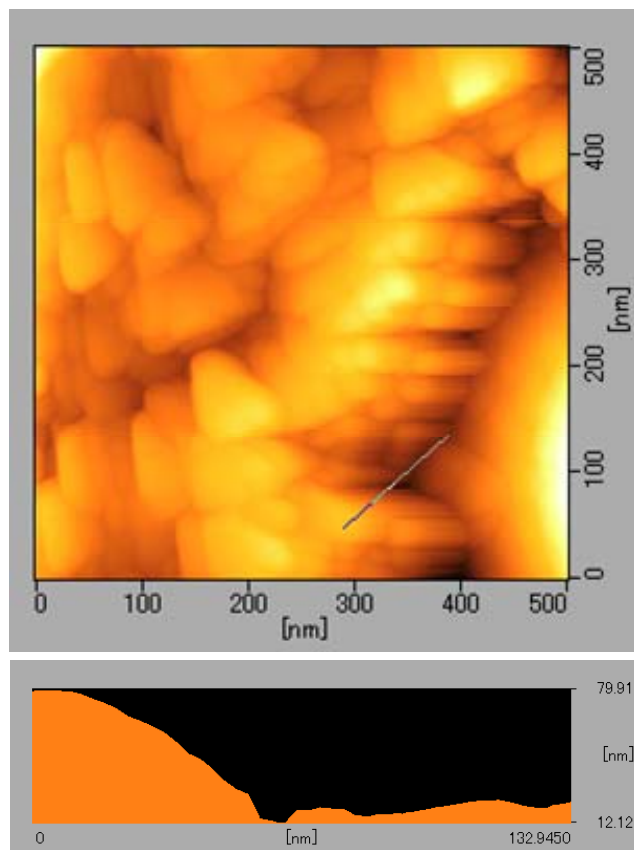

**Figure S1.** AFM image of nanocrystalline NiO film on the glass surface.

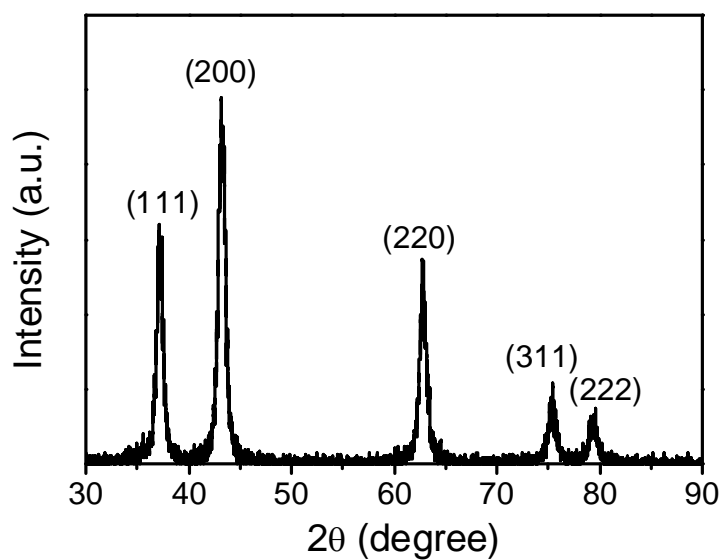

**Figure S2.** Powder XRD pattern of synthesized NiO nanoparticle powder.

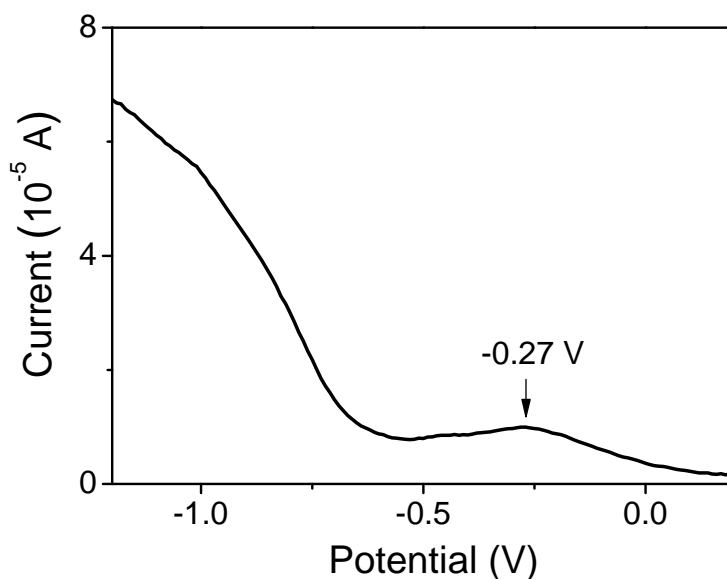

**Figure S3.** Differential pulse voltammetry (DPV) of WS-PDI (0.1 mM) in Ar-saturated 0.1 M phosphate buffer (pH 7.4).

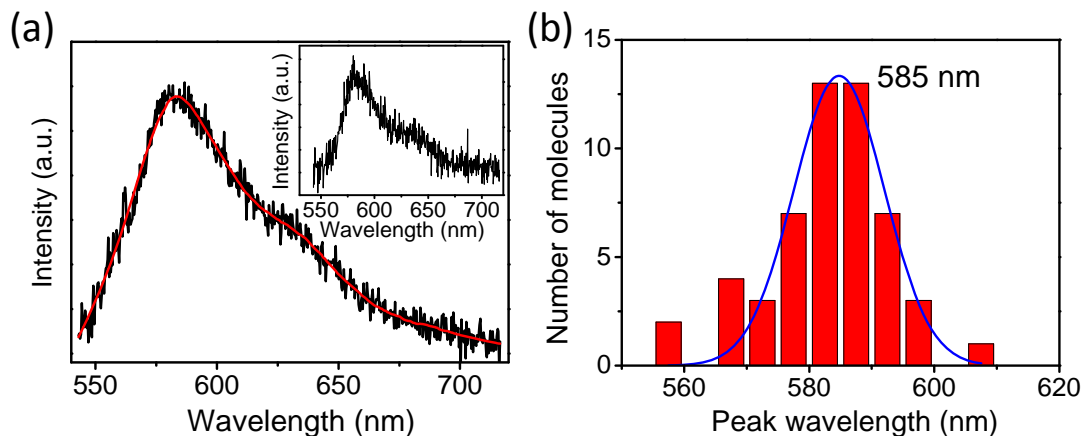

**Figure S4.** (a) Averaged single-molecule fluorescence spectra of WS-PDI (50 molecules) on the NiO surface in Ar-saturated acetonitrile. Inset shows a typical single-molecule fluorescence spectrum. (b) Histogram of peak wavelength of the fluorescence spectra observed during the 485-nm excitation for single WS-PDI molecules on the surface of NiO nanoparticles, together with a Gaussian function fitted to the histogram. A dominant distribution centered at the wavelength of about 585 nm with a 20 nm FWHM was observed.

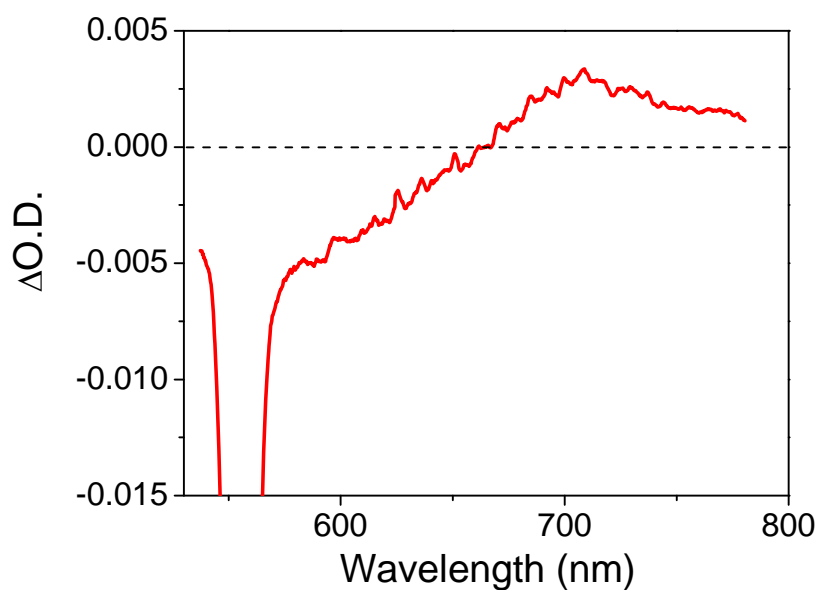

**Figure S5.** Transient absorption spectrum observed at 10 ps during the laser flash photolysis of Ar-saturated 0.1 M phosphate buffer solution (pH 7.4) containing WS-PDI (0.1 mM).

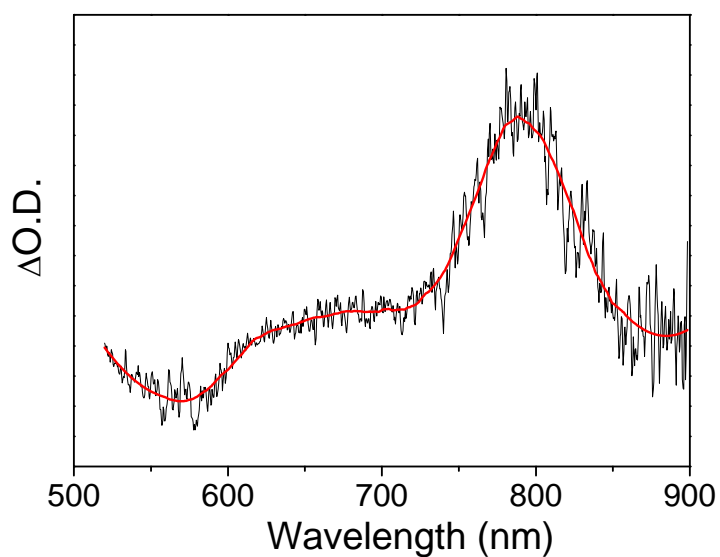

**Figure S6.** Transient absorption spectrum obtained at 1  $\mu$ s after an electron pulse during the pulse radiolysis of  $\text{NO}_2$ -saturated aqueous solution (pH 2) containing WS-PDI (0.1 mM) and  $\text{HCOONa}$  (100 mM). The molar absorption coefficient ( $\epsilon$ ) of  $\text{WS-PDI}^{\bullet-}$  was determined to be  $(5 \pm 1) \times 10^4 \text{ M}^{-1} \text{ cm}^{-1}$  at 790 nm using methyl viologen ( $\text{MV}^{\bullet+}$ ) as a reference ( $\epsilon(\text{MV}^{\bullet+}) = 13300 \text{ M}^{-1} \text{ cm}^{-1}$ , see *J. Phys. Chem. A*, 2003, **107**, 5998-6006).

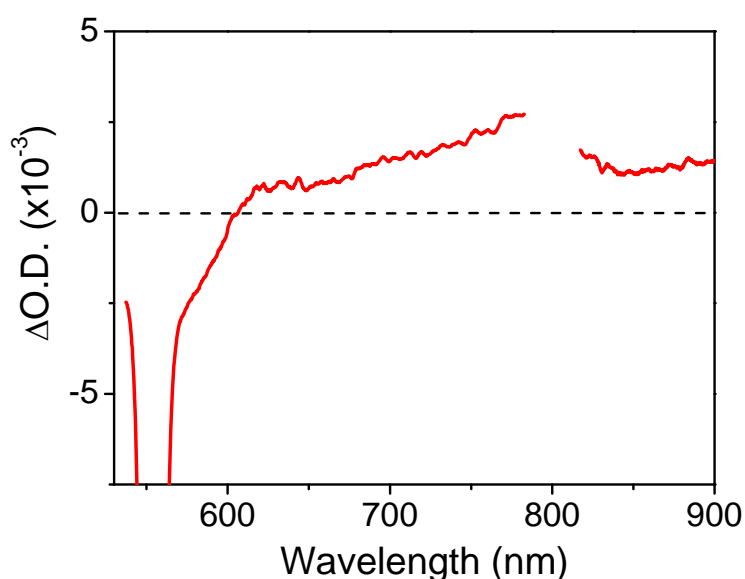

**Figure S7.** Transient absorption spectrum obtained at 10 ps during the laser flash photolysis of a WS-PDI-adsorbed NiO film in Ar-saturated acetonitrile.

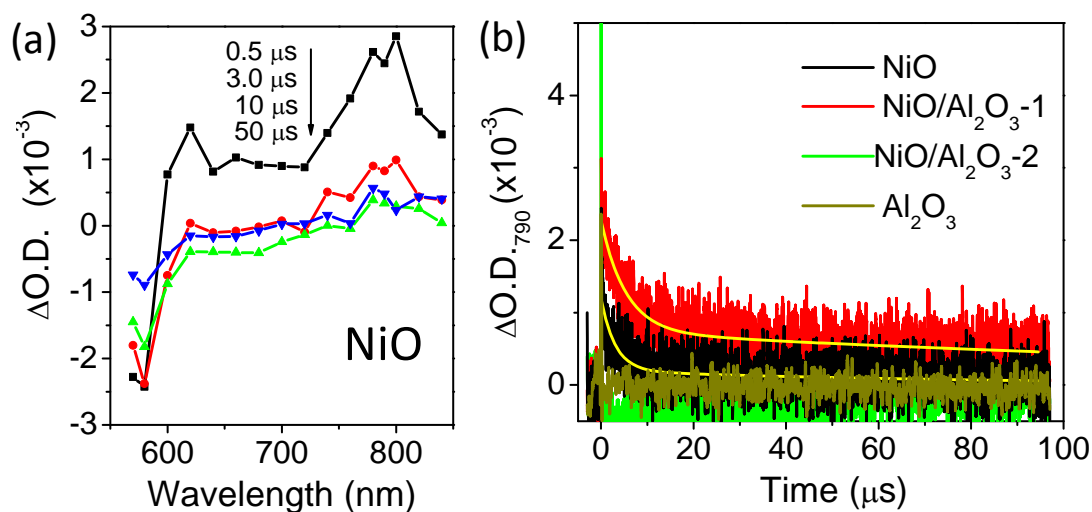

**Figure S8.** (A) Transient absorption spectra obtained during the 532-nm laser flash photolysis ( $5 \text{ mJ pulse}^{-1}$ , 5 ns FWHM) of WS-PDI-adsorbed NiO films in Ar-saturated acetonitrile. (B) Effect of the number of coating procedures of the  $\text{Al}_2\text{O}_3$  layer on the charge recombination dynamics.

**Table S1.** Kinetic Parameters of Decay of WS-PDI<sup>•-</sup> on NiO and  $\text{Al}_2\text{O}_3/\text{NiO}$

| System                                | $\tau_1$ ( $\mu\text{s}$ ) | $\tau_2$ ( $\mu\text{s}$ ) |
|---------------------------------------|----------------------------|----------------------------|
| NiO                                   | $3 \pm 1$                  | $74 \pm 4$                 |
| $\text{Al}_2\text{O}_3/\text{NiO}$ -1 | $6 \pm 1$                  | $200 \pm 6$                |

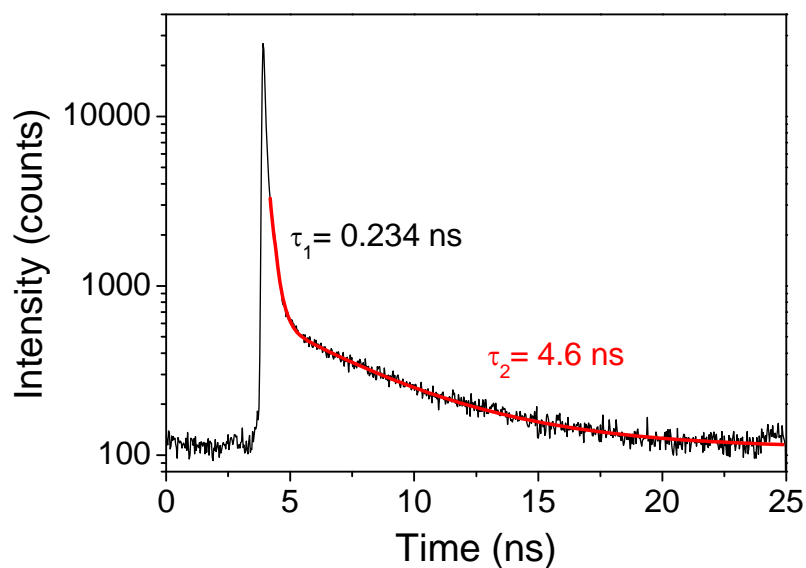

**Figure S9.** Fluorescence decay profile of WS-PDI (1 nM) in Ar-saturated acetonitrile. The red line indicates a double-exponential curve fitted to the data.  $\tau_1$  and  $\tau_2$  correspond to the laser light scattering and fluorescence decay, respectively.

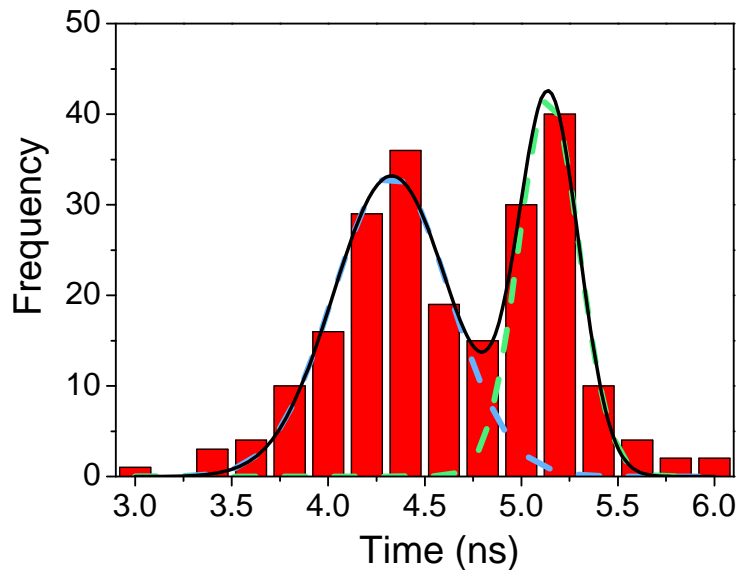

**Figure S10.** Histogram of the fluorescence lifetime obtained for WS-PDI molecules adsorbed on the thick  $\text{Al}_2\text{O}_3$  layer coated on the NiO surface ( $\text{NiO}/\text{Al}_2\text{O}_3$ -2) in Ar-saturated acetonitrile. The coating procedure of the  $\text{Al}_2\text{O}_3$  layer was repeated two times.

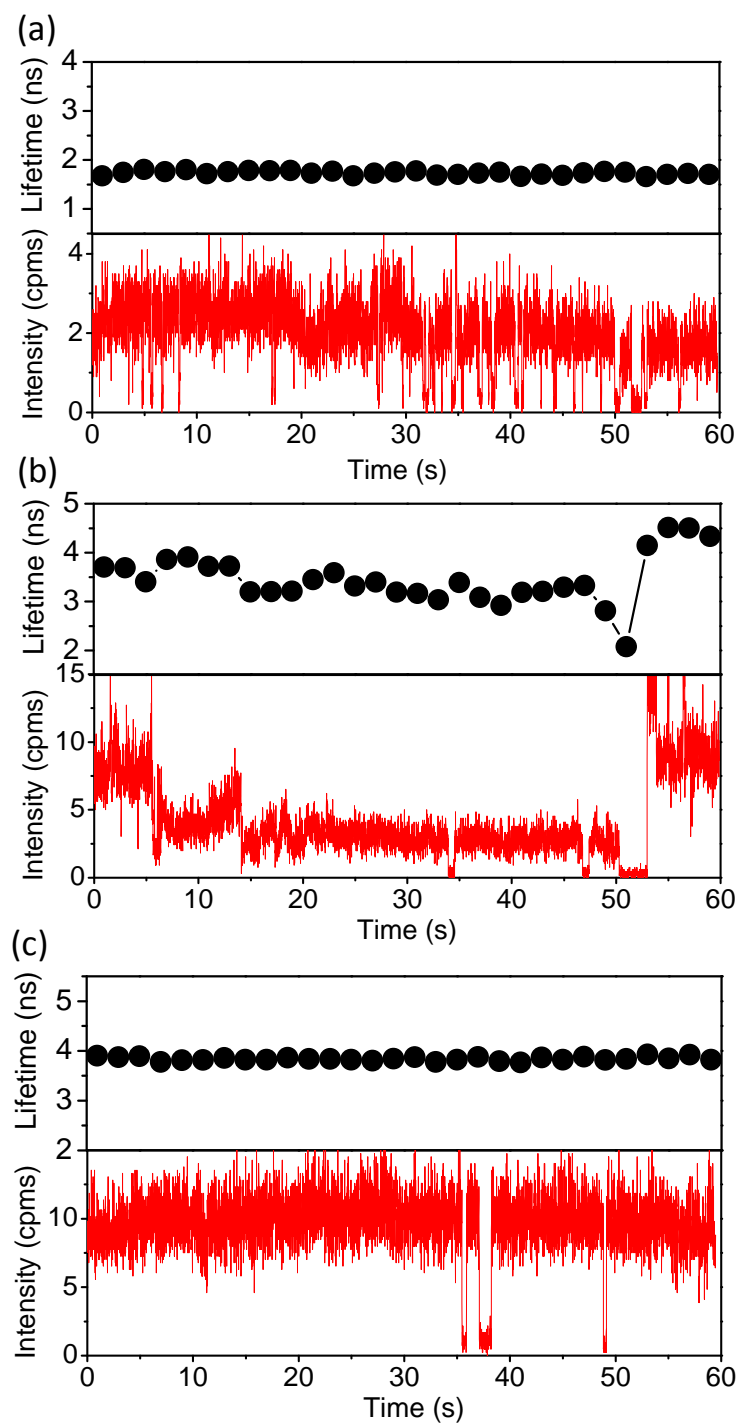

**Figure S11.** Single-molecule fluorescence polarization profiles for WS-PDI molecules adsorbed on NiO (a), NiO/Al<sub>2</sub>O<sub>3</sub>-1 (b, one time coating Al<sub>2</sub>O<sub>3</sub> layer) and NiO/Al<sub>2</sub>O<sub>3</sub>-2 (c, two times coating Al<sub>2</sub>O<sub>3</sub> layer) in Ar-saturated acetonitrile.



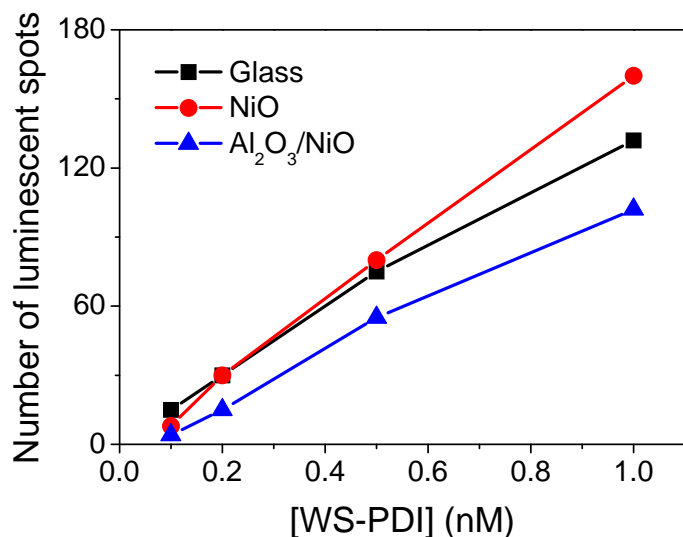

**Figure S12.** The relationship between the number of luminescent spots per  $50 \mu\text{m} \times 50 \mu\text{m}$  and WS-PDI concentration on different surfaces.

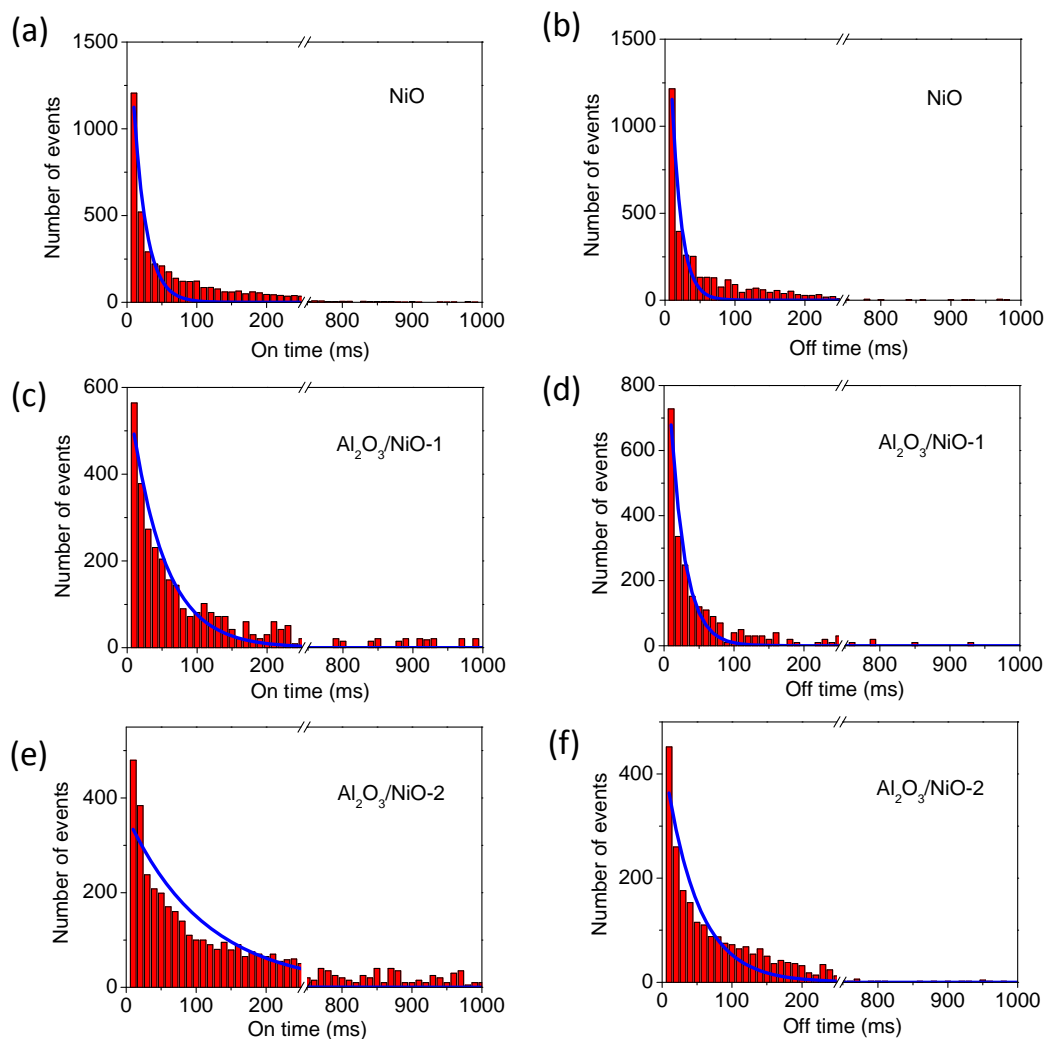

**Figure S13.** On and off time distributions for WS-PDI on NiO (a, b), Al<sub>2</sub>O<sub>3</sub>/NiO-1 (c, d), and Al<sub>2</sub>O<sub>3</sub>/NiO-2 (e, f) surfaces in Ar-saturated acetonitrile.

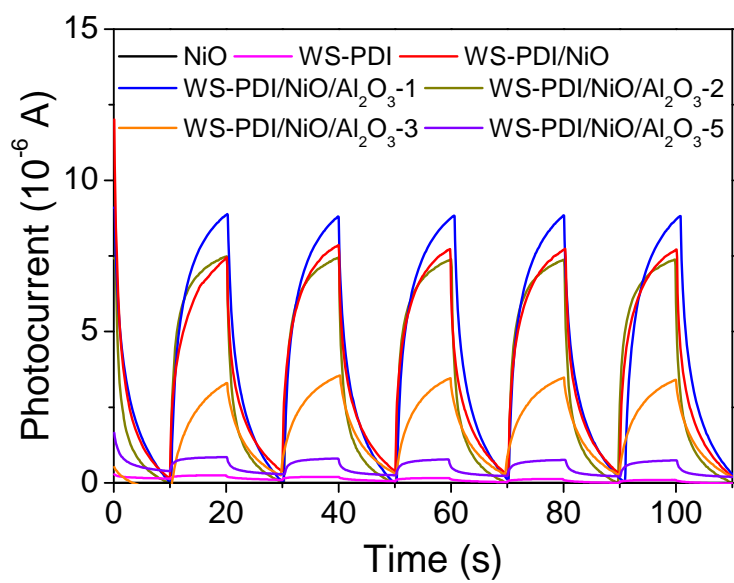

**Figure S14.** Photocurrent generation in WS-PDI-sensitized NiO electrochemical cells.
